# Supplementary material
Source: publisher figshare collection journal article supplement (https://acs.figshare.com/ndownloader/files/4319005)
Supplement: Supplementary file 1 [file 4319005]

  
data_dtt-14 
  
_audit_creation_method            SHELXL-97 
_chemical_name_systematic 
; 
 ? 
; 
_chemical_name_common             ? 
_chemical_melting_point           ? 
_chemical_formula_moiety          ? 
_chemical_formula_sum 
 'C7 H12 O4' 
_chemical_formula_weight          160.17 
  
loop_ 
 _atom_type_symbol 
 _atom_type_description 
 _atom_type_scat_dispersion_real 
 _atom_type_scat_dispersion_imag 
 _atom_type_scat_source 
 'C'  'C'   0.0181   0.0091 
 'International Tables Vol C Tables 4.2.6.8 and 6.1.1.4' 
 'H'  'H'   0.0000   0.0000 
 'International Tables Vol C Tables 4.2.6.8 and 6.1.1.4' 
 'O'  'O'   0.0492   0.0322 
 'International Tables Vol C Tables 4.2.6.8 and 6.1.1.4' 
  
_symmetry_cell_setting            Monoclinic 
_symmetry_space_group_name_H-M    P2(1)/c 
  
loop_ 
 _symmetry_equiv_pos_as_xyz 
 'x, y, z' 
 '-x, y+1/2, -z+1/2' 
 '-x, -y, -z' 
 'x, -y-1/2, z-1/2' 
  
_cell_length_a                    6.446(2) 
_cell_length_b                    5.5780(19) 
_cell_length_c                    22.186(7) 
_cell_angle_alpha                 90.00 
_cell_angle_beta                  101.943(19) 
_cell_angle_gamma                 90.00 
_cell_volume                      780.4(4) 
_cell_formula_units_Z             4 
_cell_measurement_temperature     110(2) 
_cell_measurement_reflns_used     549 
_cell_measurement_theta_min       7.02 
_cell_measurement_theta_max       52.46 
  
_exptl_crystal_description        plate 
_exptl_crystal_colour             colorless 
_exptl_crystal_size_max           0.20 
_exptl_crystal_size_mid           0.20 
_exptl_crystal_size_min           0.01 
_exptl_crystal_density_meas       ? 
_exptl_crystal_density_diffrn     1.363 
_exptl_crystal_density_method     'not measured' 
_exptl_crystal_F_000              344 
_exptl_absorpt_coefficient_mu     0.950 
_exptl_absorpt_correction_type    'multi-scan' 
_exptl_absorpt_correction_T_min   0.8328 
_exptl_absorpt_correction_T_max   0.9953 
_exptl_absorpt_process_details    'SADABS; (Sheldrick, 2006)' 
  
_exptl_special_details 
; 
 ? 
; 
  
_diffrn_ambient_temperature       110(2) 
_diffrn_radiation_wavelength      1.54178 
_diffrn_radiation_type            CuK\a 
_diffrn_radiation_source          'fine-focus sealed tube' 
_diffrn_radiation_monochromator   graphite 
_diffrn_measurement_device_type   'BRUKER GADDS D8 Discover' 
_diffrn_measurement_method        'phi and omega scans' 
_diffrn_detector_area_resol_mean  ? 
_diffrn_standards_number          ? 
_diffrn_standards_interval_count  ? 
_diffrn_standards_interval_time   ? 
_diffrn_standards_decay_%         ? 
_diffrn_reflns_number             4639 
_diffrn_reflns_av_R_equivalents   0.0762 
_diffrn_reflns_av_sigmaI/netI     0.0723 
_diffrn_reflns_limit_h_min        -7 
_diffrn_reflns_limit_h_max        7 
_diffrn_reflns_limit_k_min        -6 
_diffrn_reflns_limit_k_max        5 
_diffrn_reflns_limit_l_min        -24 
_diffrn_reflns_limit_l_max        23 
_diffrn_reflns_theta_min          7.02 
_diffrn_reflns_theta_max          57.98 
_reflns_number_total              1023 
_reflns_number_gt                 793 
_reflns_threshold_expression      >2sigma(I) 
  
_computing_data_collection        'FRAMBO (BRUKER-NONIUS, 2003)' 
_computing_cell_refinement 
; 
 CELL-NOW (Sheldrick, 2003) and SAINT (BRUKER-NONIUS, 2003) 
; 
  
_computing_data_reduction         'Bruker SAINT' 
_computing_structure_solution     'SHELXS-97 (Sheldrick, 1990)' 
_computing_structure_refinement   'SHELXL-97 (Sheldrick, 1997)' 
_computing_molecular_graphics     'X-SEED (Barbour, 2001)' 
_computing_publication_material   'Bruker SHELXTL' 
  
_refine_special_details 
; 
 Refinement of F^2^ against ALL reflections.  The weighted R-factor wR and 
 goodness of fit S are based on F^2^, conventional R-factors R are based 
 on F, with F set to zero for negative F^2^. The threshold expression of 
 F^2^ > 2sigma(F^2^) is used only for calculating R-factors(gt) etc. and is 
 not relevant to the choice of reflections for refinement.  R-factors based 
 on F^2^ are statistically about twice as large as those based on F, and R- 
 factors based on ALL data will be even larger. 
; 
  
_refine_ls_structure_factor_coef  Fsqd 
_refine_ls_matrix_type            full 
_refine_ls_weighting_scheme       calc 
_refine_ls_weighting_details 
 'calc w=1/[\s^2^(Fo^2^)+(0.0424P)^2^+14.3585P] where P=(Fo^2^+2Fc^2^)/3' 
_atom_sites_solution_primary      direct 
_atom_sites_solution_secondary    difmap 
_atom_sites_solution_hydrogens    geom 
_refine_ls_hydrogen_treatment     'constr' 
_refine_ls_extinction_method      SHELXL 
_refine_ls_extinction_coef        0.019(4) 
_refine_ls_extinction_expression 
 'Fc^*^=kFc[1+0.001xFc^2^\l^3^/sin(2\q)]^-1/4^' 
_refine_ls_number_reflns          1023 
_refine_ls_number_parameters      101 
_refine_ls_number_restraints      0 
_refine_ls_R_factor_all           0.1702 
_refine_ls_R_factor_gt            0.1500 
_refine_ls_wR_factor_ref          0.3205 
_refine_ls_wR_factor_gt           0.3127 
_refine_ls_goodness_of_fit_ref    1.214 
_refine_ls_restrained_S_all       1.214 
_refine_ls_shift/su_max           0.000 
_refine_ls_shift/su_mean          0.000 
  
loop_ 
 _atom_site_label 
 _atom_site_type_symbol 
 _atom_site_fract_x 
 _atom_site_fract_y 
 _atom_site_fract_z 
 _atom_site_U_iso_or_equiv 
 _atom_site_adp_type 
 _atom_site_occupancy 
 _atom_site_symmetry_multiplicity 
 _atom_site_calc_flag 
 _atom_site_refinement_flags 
 _atom_site_disorder_assembly 
 _atom_site_disorder_group 
O1 O 0.6461(11) 0.3017(13) 0.7795(3) 0.027(2) Uani 1 1 d . . . 
O2 O 0.8271(13) -0.0390(14) 0.7602(3) 0.035(2) Uani 1 1 d . . . 
O3 O 0.7102(11) 0.2274(14) 0.6883(3) 0.030(2) Uani 1 1 d . . . 
O4 O 1.0252(11) 0.3520(13) 0.9294(3) 0.028(2) Uani 1 1 d . . . 
C1 C 0.7297(16) 0.1632(19) 0.7402(5) 0.022(3) Uani 1 1 d . . . 
C2 C 0.8079(18) -0.145(2) 0.8199(5) 0.026(3) Uani 1 1 d . . . 
H2A H 0.9265 -0.2580 0.8339 0.031 Uiso 1 1 calc R . . 
H2B H 0.6736 -0.2362 0.8147 0.031 Uiso 1 1 calc R . . 
C3 C 0.8113(15) 0.0468(19) 0.8681(4) 0.020(2) Uani 1 1 d . . . 
C4 C 0.6344(17) 0.2191(19) 0.8411(5) 0.025(3) Uani 1 1 d . . . 
H4A H 0.4963 0.1388 0.8393 0.029 Uiso 1 1 calc R . . 
H4B H 0.6408 0.3596 0.8687 0.029 Uiso 1 1 calc R . . 
C5 C 1.0258(17) 0.1738(19) 0.8840(5) 0.028(3) Uani 1 1 d . . . 
H5A H 1.1386 0.0551 0.8994 0.034 Uiso 1 1 calc R . . 
H5B H 1.0570 0.2488 0.8464 0.034 Uiso 1 1 calc R . . 
C6 C 1.2287(18) 0.456(2) 0.9487(5) 0.034(3) Uani 1 1 d . . . 
H6A H 1.2237 0.5776 0.9803 0.051 Uiso 1 1 calc R . . 
H6B H 1.2719 0.5320 0.9133 0.051 Uiso 1 1 calc R . . 
H6C H 1.3314 0.3317 0.9657 0.051 Uiso 1 1 calc R . . 
C7 C 0.7575(18) -0.071(2) 0.9259(5) 0.032(3) Uani 1 1 d . . . 
H7A H 0.6196 -0.1515 0.9148 0.047 Uiso 1 1 calc R . . 
H7B H 0.7517 0.0519 0.9570 0.047 Uiso 1 1 calc R . . 
H7C H 0.8670 -0.1892 0.9427 0.047 Uiso 1 1 calc R . . 
  
loop_ 
 _atom_site_aniso_label 
 _atom_site_aniso_U_11 
 _atom_site_aniso_U_22 
 _atom_site_aniso_U_33 
 _atom_site_aniso_U_23 
 _atom_site_aniso_U_13 
 _atom_site_aniso_U_12 
O1 0.035(4) 0.020(4) 0.026(4) 0.003(3) 0.008(3) 0.000(4) 
O2 0.046(5) 0.026(5) 0.030(5) -0.002(4) 0.003(4) 0.005(4) 
O3 0.023(4) 0.042(5) 0.025(5) 0.001(4) 0.008(3) -0.002(4) 
O4 0.026(4) 0.025(4) 0.031(4) -0.006(3) 0.004(3) -0.007(3) 
C1 0.029(6) 0.024(6) 0.014(6) -0.003(5) 0.008(4) -0.009(5) 
C2 0.030(6) 0.024(6) 0.023(6) 0.010(5) 0.002(5) -0.004(5) 
C3 0.022(5) 0.020(6) 0.019(5) 0.000(5) 0.003(4) -0.008(5) 
C4 0.032(6) 0.013(6) 0.033(6) 0.003(5) 0.018(5) -0.004(5) 
C5 0.036(7) 0.019(6) 0.027(6) -0.003(5) -0.001(5) 0.002(5) 
C6 0.039(7) 0.028(6) 0.032(7) -0.009(5) 0.003(5) -0.018(6) 
C7 0.033(6) 0.030(7) 0.031(7) 0.002(5) 0.005(5) -0.006(6) 
  
_geom_special_details 
; 
 All esds (except the esd in the dihedral angle between two l.s. planes) 
 are estimated using the full covariance matrix.  The cell esds are taken 
 into account individually in the estimation of esds in distances, angles 
 and torsion angles; correlations between esds in cell parameters are only 
 used when they are defined by crystal symmetry.  An approximate (isotropic) 
 treatment of cell esds is used for estimating esds involving l.s. planes. 
; 
  
loop_ 
 _geom_bond_atom_site_label_1 
 _geom_bond_atom_site_label_2 
 _geom_bond_distance 
 _geom_bond_site_symmetry_2 
 _geom_bond_publ_flag 
O1 C1 1.357(12) . ? 
O1 C4 1.460(12) . ? 
O2 C1 1.322(13) . ? 
O2 C2 1.481(13) . ? 
O3 C1 1.187(12) . ? 
O4 C5 1.416(13) . ? 
O4 C6 1.418(13) . ? 
C2 C3 1.510(15) . ? 
C2 H2A 0.9900 . ? 
C2 H2B 0.9900 . ? 
C3 C4 1.516(15) . ? 
C3 C5 1.529(14) . ? 
C3 C7 1.543(14) . ? 
C4 H4A 0.9900 . ? 
C4 H4B 0.9900 . ? 
C5 H5A 0.9900 . ? 
C5 H5B 0.9900 . ? 
C6 H6A 0.9800 . ? 
C6 H6B 0.9800 . ? 
C6 H6C 0.9800 . ? 
C7 H7A 0.9800 . ? 
C7 H7B 0.9800 . ? 
C7 H7C 0.9800 . ? 
  
loop_ 
 _geom_angle_atom_site_label_1 
 _geom_angle_atom_site_label_2 
 _geom_angle_atom_site_label_3 
 _geom_angle 
 _geom_angle_site_symmetry_1 
 _geom_angle_site_symmetry_3 
 _geom_angle_publ_flag 
C1 O1 C4 121.7(8) . . ? 
C1 O2 C2 121.2(8) . . ? 
C5 O4 C6 111.4(8) . . ? 
O3 C1 O2 122.0(10) . . ? 
O3 C1 O1 118.3(10) . . ? 
O2 C1 O1 119.7(9) . . ? 
O2 C2 C3 111.1(8) . . ? 
O2 C2 H2A 109.4 . . ? 
C3 C2 H2A 109.4 . . ? 
O2 C2 H2B 109.4 . . ? 
C3 C2 H2B 109.4 . . ? 
H2A C2 H2B 108.0 . . ? 
C2 C3 C4 105.6(8) . . ? 
C2 C3 C5 111.8(9) . . ? 
C4 C3 C5 111.6(9) . . ? 
C2 C3 C7 108.2(9) . . ? 
C4 C3 C7 108.6(8) . . ? 
C5 C3 C7 110.8(8) . . ? 
O1 C4 C3 113.0(8) . . ? 
O1 C4 H4A 109.0 . . ? 
C3 C4 H4A 109.0 . . ? 
O1 C4 H4B 109.0 . . ? 
C3 C4 H4B 109.0 . . ? 
H4A C4 H4B 107.8 . . ? 
O4 C5 C3 110.7(9) . . ? 
O4 C5 H5A 109.5 . . ? 
C3 C5 H5A 109.5 . . ? 
O4 C5 H5B 109.5 . . ? 
C3 C5 H5B 109.5 . . ? 
H5A C5 H5B 108.1 . . ? 
O4 C6 H6A 109.5 . . ? 
O4 C6 H6B 109.5 . . ? 
H6A C6 H6B 109.5 . . ? 
O4 C6 H6C 109.5 . . ? 
H6A C6 H6C 109.5 . . ? 
H6B C6 H6C 109.5 . . ? 
C3 C7 H7A 109.5 . . ? 
C3 C7 H7B 109.5 . . ? 
H7A C7 H7B 109.5 . . ? 
C3 C7 H7C 109.5 . . ? 
H7A C7 H7C 109.5 . . ? 
H7B C7 H7C 109.5 . . ? 
  
loop_ 
 _geom_torsion_atom_site_label_1 
 _geom_torsion_atom_site_label_2 
 _geom_torsion_atom_site_label_3 
 _geom_torsion_atom_site_label_4 
 _geom_torsion 
 _geom_torsion_site_symmetry_1 
 _geom_torsion_site_symmetry_2 
 _geom_torsion_site_symmetry_3 
 _geom_torsion_site_symmetry_4 
 _geom_torsion_publ_flag 
C2 O2 C1 O3 -165.7(10) . . . . ? 
C2 O2 C1 O1 13.3(14) . . . . ? 
C4 O1 C1 O3 170.6(9) . . . . ? 
C4 O1 C1 O2 -8.5(14) . . . . ? 
C1 O2 C2 C3 -39.2(13) . . . . ? 
O2 C2 C3 C4 55.5(11) . . . . ? 
O2 C2 C3 C5 -66.0(11) . . . . ? 
O2 C2 C3 C7 171.7(8) . . . . ? 
C1 O1 C4 C3 29.9(13) . . . . ? 
C2 C3 C4 O1 -51.7(10) . . . . ? 
C5 C3 C4 O1 69.9(11) . . . . ? 
C7 C3 C4 O1 -167.7(8) . . . . ? 
C6 O4 C5 C3 174.6(9) . . . . ? 
C2 C3 C5 O4 -179.8(8) . . . . ? 
C4 C3 C5 O4 62.2(11) . . . . ? 
C7 C3 C5 O4 -58.9(11) . . . . ? 
  
_diffrn_measured_fraction_theta_max    0.940 
_diffrn_reflns_theta_full              57.98 
_diffrn_measured_fraction_theta_full   0.940 
_refine_diff_density_max    0.554 
_refine_diff_density_min   -0.455 
_refine_diff_density_rms    0.117 

# start Validation Reply Form
_vrf_THETM01_dtt-14
;
PROBLEM: The value of sine(theta_max)/wavelength is less than 0.550
RESPONSE: Data was collected using Cu X-ray source and a multiwire
detector. The geometry restricts the data collection beyond 120 degrees
two-theta.
;
# end Validation Reply Form
